# Supplementary material for: Effectiveness of lower limb robotic rehabilitation on peak of oxygen uptake among patients with stroke: a systematic review and meta-analysis
Source: PubMed Central journal article supplement — BMJ Open. 2024 Oct 17;14(10):e082985. doi: 10.1136/bmjopen-2023-082985 (PMC11487842; doi:10.1136/bmjopen-2023-082985), 2024-10-17
Supplement: bmjopen-14-10-s001.pdf [file bmjopen-14-10-s001.pdf]

### **Web of Science search strategy**

((((((("Stroke") OR "Brain Infarction") OR "Brain Stem Infarctions") OR "Cerebral Infarction") OR "Hemorrhagic Stroke") OR "Ischemic Stroke") OR "Embolic Stroke") OR "Thrombotic Stroke") (Title) and robot (Title)

### **PubMed search strategy**

#1 (((((((("Stroke"[Mesh]) OR "Brain Infarction"[Mesh]) OR "Brain Stem Infarctions"[Mesh]) OR "Cerebral Infarction"[Mesh]) OR "Hemorrhagic Stroke"[Mesh]) OR "Ischemic Stroke"[Mesh]) OR "Embolic Stroke"[Mesh]) OR "Thrombotic Stroke"[Mesh])

#2(robot[Title/Abstract])

#3 #1AND #2

### **Science Direct search strategy**

Title, abstract, keywords: (((((((("Stroke") OR "Brain Infarction") OR "Brain Stem Infarctions") OR "Cerebral Infarction") OR "Hemorrhagic Stroke") OR "Ischemic Stroke") OR "Embolic Stroke") OR "Thrombotic Stroke"))AND("Robot")

### **Embase search strategy**

#1'stroke'/exp OR 'stroke' OR 'brain infarction'/exp OR 'brain infarction' OR 'brain stem infarctions'/exp OR 'brain stem infarctions' OR 'cerebral infarction'/exp OR 'cerebral infarction' OR 'hemorrhagic stroke'/exp OR 'hemorrhagic stroke' OR 'ischemic stroke'/exp OR 'ischemic stroke' OR 'embolic stroke'/exp OR 'embolic stroke' OR 'thrombotic stroke'/exp OR 'thrombotic stroke'

#2'robot'/exp

#3 #1AND #2

### **CNKI search strategy**

(主题：脑卒中) OR (主题：脑血管意外) OR (主题：脑梗死) OR (主题：中风) OR (主题：缺血性脑卒中) OR (主题：出血性脑卒中) AND (主题：机器人)

### **Wanfang search strategy**

(主题:(脑卒中) or 主题:(脑血管意外) or 主题:(脑梗死) or 主题:(中风) or 主题:(缺血性脑卒中) or 主题:(出血性脑卒中)) AND 主题： (机器人)

### **VIP search strategy**

题名或关键词=脑梗死 OR 题名或关键词=脑卒中 OR 题名或关键词=中风 OR 题名或关键词=脑血管意外 OR 题名或关键词=缺血性脑卒中 AND 题名或关键词=机器人
