# Supplementary material for: Effectiveness of lower limb robotic rehabilitation on peak of oxygen uptake among patients with stroke: a systematic review and meta-analysis
Source: PubMed Central journal article supplement — BMJ Open. 2024 Oct 17;14(10):e082985. doi: 10.1136/bmjopen-2023-082985 (PMC11487842; doi:10.1136/bmjopen-2023-082985), 2024-10-17
Supplement: bmjopen-14-10-s003.pdf [file bmjopen-14-10-s003.pdf]

Online supplemental Table 2.GRADEpro GDT evidence quality.

| Certainty assessment      |              |                      |                      |              |             |                      | № of patients |               | Effect            |                                     | Certainty        | Importance |
|---------------------------|--------------|----------------------|----------------------|--------------|-------------|----------------------|---------------|---------------|-------------------|-------------------------------------|------------------|------------|
| № of studies              | Study design | Risk of bias         | Inconsistency        | Indirectness | Imprecision | Other considerations | Robot group   | control group | Relative (95% CI) | Absolute (95% CI)                   |                  |            |
| <b>HRrest</b>             |              |                      |                      |              |             |                      |               |               |                   |                                     |                  |            |
| 4                         | RCT          | serious <sup>a</sup> | serious <sup>b</sup> | not serious  | not serious | none                 | 73            | 66            | -                 | SMD <b>0.30</b><br>(-0.12 to 0.73 ) | ⊕⊕○○<br>Low      | IMPORTANT  |
| <b>SBPpeak</b>            |              |                      |                      |              |             |                      |               |               |                   |                                     |                  |            |
| 2                         | RCT          | serious <sup>a</sup> | not serious          | not serious  | not serious | none                 | 50            | 43            | -                 | SMD <b>0.04</b><br>(-0.44 to 0.52 ) | ⊕⊕⊕○<br>Moderate | IMPORTANT  |
| <b>DBPpeak</b>            |              |                      |                      |              |             |                      |               |               |                   |                                     |                  |            |
| 2                         | RCT          | serious <sup>a</sup> | not serious          | not serious  | not serious | none                 | 50            | 43            | -                 | SMD <b>0.46</b><br>(-3.82 to 4.73 ) | ⊕⊕⊕○<br>Moderate | IMPORTANT  |
| <b>VO<sub>2</sub>peak</b> |              |                      |                      |              |             |                      |               |               |                   |                                     |                  |            |
| 4                         | RCT          | serious <sup>a</sup> | serious <sup>b</sup> | not serious  | not serious | none                 | 86            | 79            | -                 | SMD <b>0.71</b><br>(0.28 to 1.13 )  | ⊕⊕○○<br>Low      | IMPORTANT  |

**RCT:** Randomized controlled trial; **CI:** confidence interval; **SMD:** standard mean difference; **HRrest:** heart rate at rest; **SBPpeak:** peak of systolic blood pressure; **DBPpeak:** peak of diastolic blood pressure; **VO<sub>2</sub>peak:** peak of oxygen consumption

**Explanations**

a. lack of blind, b. different intervention,
